# Supplementary material
Source: PubMed Central journal article supplement (PMC3845496)

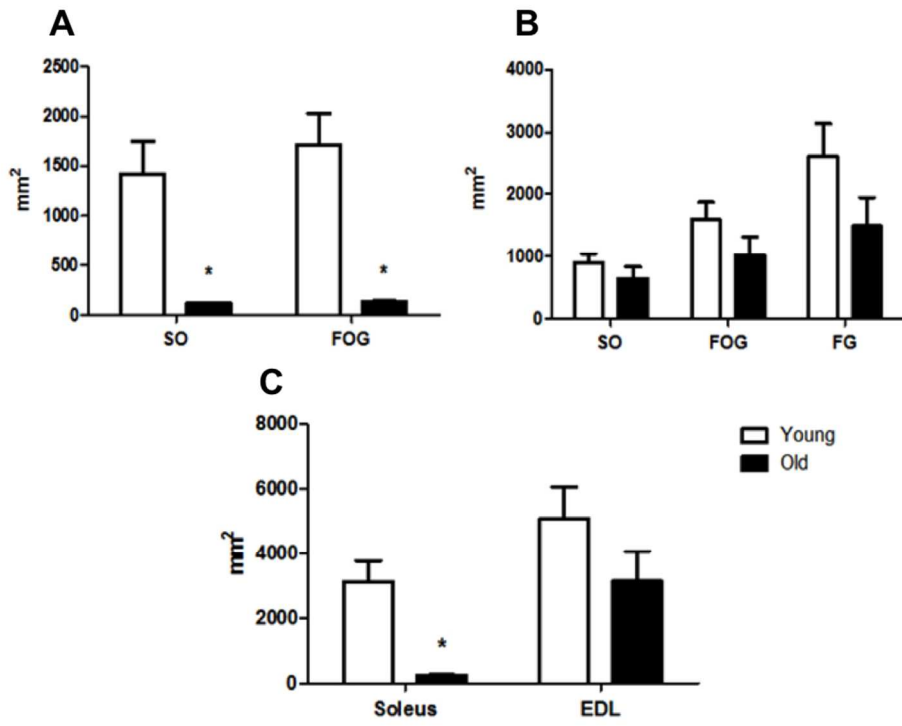

87x69mm (310 x 310 DPI)

Supplement: NIHMS525306-supplement-1_si_001.pdf [file NIHMS525306-supplement-1_si_001.pdf]

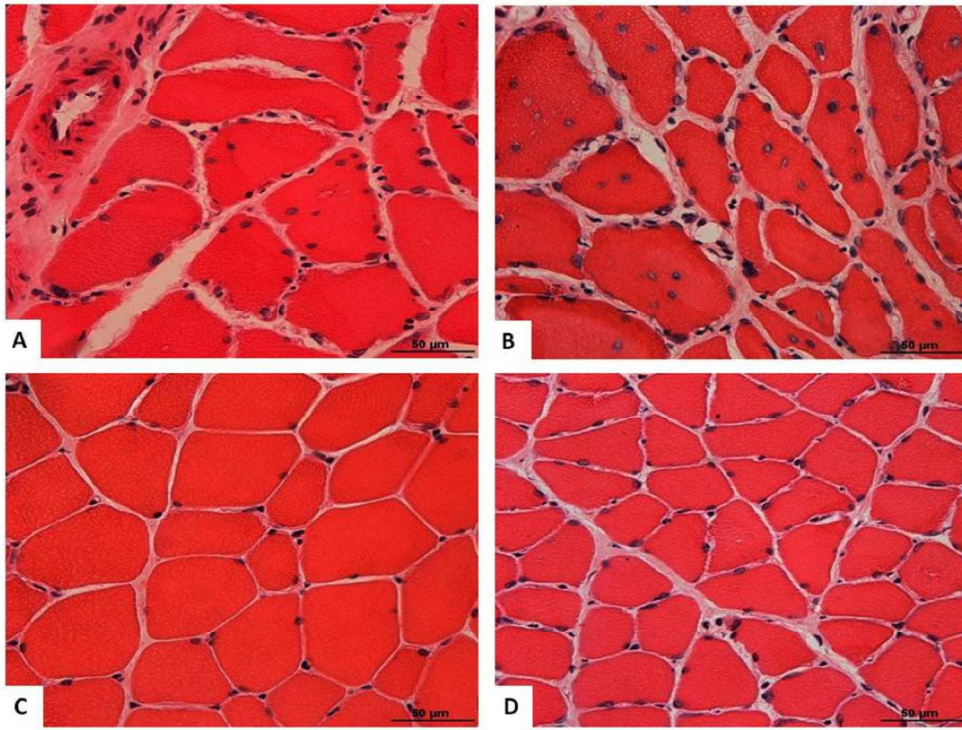

88x66mm (310 x 310 DPI)

Supplement: NIHMS525306-supplement-2_si_002.pdf [file NIHMS525306-supplement-2_si_002.pdf]
